# Supplementary material for: New dominant spa type t2741 in livestock-associated MRSA (CC398-MRSA-V) in Finnish fattening pigs at slaughter
Source: Antimicrob Resist Infect Control. 2016 Mar 2;5:6. doi: 10.1186/s13756-016-0105-8 (PMC4776440; doi:10.1186/s13756-016-0105-8)
Supplement: Additional file 1: — Overview on phenotypic and genotypic characteristics of each strain. (XLSX 31 kb) [file 13756_2016_105_MOESM1_ESM.xlsx]

## Sheet: Results_overview
CC	spa type	repeat succession	SCCmec	isolate ID	Herd	Resistance profile	Host	Sample	Country	Date	pvl	mecA	blaZ/I/R	ermB	aadD	tetK	tetM	sdrM	hld	seh	icaA/C/D	fnbB	agr	cap	lnuB
CC1	t127	07-23-21-16-34-33-13	V	MRSA_5	H2	PEN, OXA, FOX, TET, CLI, ERY	Pig	Nasal swab	Finland	2015	neg	pos	pos	pos	neg	pos	neg	pos	pos	pos	pos	pos	agrIII	cap8	neg
CC1	t1381	07-23-21-16-34-33-34	V	MRSA_6	H2	PEN, OXA, FOX, TET, CLI, ERY	Pig	Nasal swab	Finland	2015	neg	pos	pos	pos	neg	pos	neg	pos	pos	pos	pos	pos	agrIII	cap8	neg
CC1	t1381	07-23-21-16-34-33-34	V	MRSA_7	H2	PEN, OXA, FOX, TET, CLI, ERY	Pig	Nasal swab	Finland	2015	neg	pos	pos	pos	neg	pos	neg	pos	pos	pos	pos	pos	agrIII	cap8	neg
CC1	t1381	07-23-21-16-34-33-34	V	MRSA_4	H2	PEN, OXA, FOX, TET, CLI, ERY	Pig	Nasal swab	Finland	2015	neg	pos	pos	pos	neg	pos	neg	pos	pos	pos	pos	pos	agrIII	cap8	neg
CC398	t011	08-16-02-25-34-24-25	V	MRSA_49	H18	PEN, OXA, FOX, TET, CLI, ERY	Pig	Nasal swab	Finland	2015	neg	pos	pos	pos	neg	pos	pos	pos	pos	neg	pos	neg	agrI	cap5	pos
CC398	t034	08-16-02-25-02-25-34-24-25	V	MRSA_3	H1	PEN, OXA, FOX, TET, CLI	Pig	Nasal swab	Finland	2015	neg	pos	pos	neg	neg	pos	pos	pos	pos	neg	pos	pos	agrI	cap5	pos
CC398	t034	08-16-02-25-02-25-34-24-25	V	MRSA_22	H7	PEN, OXA, FOX, TET, CLI	Pig	Nasal swab	Finland	2015	neg	pos	pos	neg	neg	pos	pos	pos	pos	neg	pos	pos	agrI	cap5	pos
CC398	t034	08-16-02-25-02-25-34-24-25	V	MRSA_34	H12	PEN, OXA, FOX, TET, CLI	Pig	Nasal swab	Finland	2015	neg	pos	pos	neg	neg	pos	pos	pos	pos	neg	pos	pos	agrI	cap5	pos
CC398	t034	08-16-02-25-02-25-34-24-25	V	MRSA_35	H12	PEN, OXA, FOX, TET, CLI	Pig	Nasal swab	Finland	2015	neg	pos	pos	neg	neg	pos	pos	pos	pos	neg	pos	pos	agrI	cap5	pos
CC398	t034	08-16-02-25-02-25-34-24-25	V	MRSA_36	H12	PEN, OXA, FOX, TET, CLI	Pig	Nasal swab	Finland	2015	neg	pos	pos	neg	neg	pos	pos	pos	pos	neg	pos	pos	agrI	cap5	pos
CC398	t034	08-16-02-25-02-25-34-24-25	V	MRSA_48	H18	PEN, OXA, FOX, TET, CLI	Pig	Nasal swab	Finland	2015	neg	pos	pos	neg	neg	pos	pos	pos	pos	neg	pos	pos	agrI	cap5	pos
CC398	t034	08-16-02-25-02-25-34-24-25	V	MRSA_29	H10	PEN, OXA, FOX, TET, CLI, CIP	Pig	Nasal swab	Finland	2015	neg	pos	pos	neg	pos	pos	pos	pos	pos	neg	pos	pos	agrI	cap5	pos
CC398	t108	08-16-02-25-24-25	V	MRSA_8	H3	PEN, OXA, FOX, TET	Pig	Nasal swab	Finland	2015	neg	pos	pos	neg	neg	pos	pos	pos	pos	neg	pos	pos	agrI	cap5	neg
CC398	t108	08-16-02-25-24-25	V	MRSA_9	H3	PEN, OXA, FOX, TET	Pig	Nasal swab	Finland	2015	neg	pos	pos	neg	neg	pos	pos	pos	pos	neg	pos	pos	agrI	cap5	neg
CC398	t108	08-16-02-25-24-25	V	MRSA_10	H3	PEN, OXA, FOX, TET	Pig	Nasal swab	Finland	2015	neg	pos	pos	neg	neg	pos	pos	pos	pos	neg	pos	pos	agrI	cap5	neg
CC398	t108	08-16-02-25-24-25	V	MRSA_11	H3	PEN, OXA, FOX, TET	Pig	Nasal swab	Finland	2015	neg	pos	pos	neg	neg	pos	pos	pos	pos	neg	pos	pos	agrI	cap5	neg
CC398	t108	08-16-02-25-24-25	V	MRSA_45	H16	PEN, OXA, FOX, TET	Pig	Nasal swab	Finland	2015	neg	pos	pos	neg	neg	pos	pos	pos	pos	neg	pos	pos	agrI	cap5	neg
CC398	t2741	08-16-02-25-34-24-25-16	V	MRSA_1	H1	PEN, OXA, FOX, TET, CLI, ERY	Pig	Nasal swab	Finland	2015	neg	pos	pos	pos	neg	pos	pos	pos	pos	neg	pos	neg	agrI	cap5	pos
CC398	t2741	08-16-02-25-34-24-25-16	V	MRSA_16	H5	PEN, OXA, FOX, TET, CLI, ERY	Pig	Nasal swab	Finland	2015	neg	pos	pos	pos	neg	pos	pos	pos	pos	neg	pos	neg	agrI	cap5	pos
CC398	t2741	08-16-02-25-34-24-25-16	V	MRSA_17	H5	PEN, OXA, FOX, TET, CLI, ERY	Pig	Nasal swab	Finland	2015	neg	pos	pos	pos	neg	pos	pos	pos	pos	neg	pos	neg	agrI	cap5	pos
CC398	t2741	08-16-02-25-34-24-25-16	V	MRSA_18	H6	PEN, OXA, FOX, TET, CLI, ERY	Pig	Nasal swab	Finland	2015	neg	pos	pos	pos	neg	pos	pos	pos	pos	neg	pos	neg	agrI	cap5	pos
CC398	t2741	08-16-02-25-34-24-25-16	V	MRSA_19	H6	PEN, OXA, FOX, TET, CLI, ERY	Pig	Nasal swab	Finland	2015	neg	pos	pos	pos	neg	pos	pos	pos	pos	neg	pos	neg	agrI	cap5	pos
CC398	t2741	08-16-02-25-34-24-25-16	V	MRSA_20	H6	PEN, OXA, FOX, TET, CLI, ERY	Pig	Nasal swab	Finland	2015	neg	pos	pos	pos	neg	pos	pos	pos	pos	neg	pos	neg	agrI	cap5	pos
CC398	t2741	08-16-02-25-34-24-25-16	V	MRSA_21	H7	PEN, OXA, FOX, TET, CLI, ERY	Pig	Nasal swab	Finland	2015	neg	pos	pos	pos	neg	pos	pos	pos	pos	neg	pos	neg	agrI	cap5	pos
CC398	t2741	08-16-02-25-34-24-25-16	V	MRSA_23	H8	PEN, OXA, FOX, TET, CLI, ERY	Pig	Nasal swab	Finland	2015	neg	pos	pos	pos	neg	pos	pos	pos	pos	neg	pos	neg	agrI	cap5	pos
CC398	t2741	08-16-02-25-34-24-25-16	V	MRSA_24	H8	PEN, OXA, FOX, TET, CLI, ERY	Pig	Nasal swab	Finland	2015	neg	pos	pos	pos	neg	pos	pos	pos	pos	neg	pos	neg	agrI	cap5	pos
CC398	t2741	08-16-02-25-34-24-25-16	V	MRSA_26	H9	PEN, OXA, FOX, TET, CLI, ERY	Pig	Nasal swab	Finland	2015	neg	pos	pos	pos	neg	pos	pos	pos	pos	neg	pos	neg	agrI	cap5	pos
CC398	t2741	08-16-02-25-34-24-25-16	V	MRSA_27	H9	PEN, OXA, FOX, TET, CLI, ERY	Pig	Nasal swab	Finland	2015	neg	pos	pos	pos	neg	pos	pos	pos	pos	neg	pos	neg	agrI	cap5	pos
CC398	t2741	08-16-02-25-34-24-25-16	V	MRSA_28	H9	PEN, OXA, FOX, TET, CLI, ERY	Pig	Nasal swab	Finland	2015	neg	pos	pos	pos	neg	pos	pos	pos	pos	neg	pos	neg	agrI	cap5	pos
CC398	t2741	08-16-02-25-34-24-25-16	V	MRSA_33	H11	PEN, OXA, FOX, TET, CLI, ERY	Pig	Nasal swab	Finland	2015	neg	pos	pos	pos	neg	pos	pos	pos	pos	neg	pos	neg	agrI	cap5	pos
CC398	t2741	08-16-02-25-34-24-25-16	V	MRSA_37	H13	PEN, OXA, FOX, TET, CLI, ERY	Pig	Nasal swab	Finland	2015	neg	pos	pos	pos	neg	pos	pos	pos	pos	neg	pos	neg	agrI	cap5	pos
CC398	t2741	08-16-02-25-34-24-25-16	V	MRSA_38	H14	PEN, OXA, FOX, TET, CLI, ERY	Pig	Nasal swab	Finland	2015	neg	pos	pos	pos	neg	pos	pos	pos	pos	neg	pos	neg	agrI	cap5	pos
CC398	t2741	08-16-02-25-34-24-25-16	V	MRSA_39	H14	PEN, OXA, FOX, TET, CLI, ERY	Pig	Nasal swab	Finland	2015	neg	pos	pos	pos	neg	pos	pos	pos	pos	neg	pos	neg	agrI	cap5	pos
CC398	t2741	08-16-02-25-34-24-25-16	V	MRSA_40	H14	PEN, OXA, FOX, TET, CLI, ERY	Pig	Nasal swab	Finland	2015	neg	pos	pos	pos	neg	pos	pos	pos	pos	neg	pos	neg	agrI	cap5	pos
CC398	t2741	08-16-02-25-34-24-25-16	V	MRSA_46	H17	PEN, OXA, FOX, TET, CLI, ERY	Pig	Nasal swab	Finland	2015	neg	pos	pos	pos	neg	pos	pos	pos	pos	neg	pos	neg	agrI	cap5	pos
CC398	t2741	08-16-02-25-34-24-25-16	V	MRSA_50	H18	PEN, OXA, FOX, TET, CLI, ERY	Pig	Nasal swab	Finland	2015	neg	pos	pos	pos	neg	pos	pos	pos	pos	neg	pos	neg	agrI	cap5	pos
CC398	t2741	08-16-02-25-34-24-25-16	V	MRSA_2	H1	PEN, OXA, FOX, TET, CLI	Pig	Nasal swab	Finland	2015	neg	pos	pos	neg	neg	pos	pos	pos	pos	neg	pos	neg	agrI	cap5	pos
CC398	t2741	08-16-02-25-34-24-25-16	V	MRSA_12	H4	PEN, OXA, FOX, TET, CLI	Pig	Nasal swab	Finland	2015	neg	pos	pos	neg	neg	pos	pos	pos	pos	neg	pos	neg	agrI	cap5	pos
CC398	t2741	08-16-02-25-34-24-25-16	V	MRSA_13	H4	PEN, OXA, FOX, TET, CLI	Pig	Nasal swab	Finland	2015	neg	pos	pos	neg	neg	pos	pos	pos	pos	neg	pos	neg	agrI	cap5	pos
CC398	t2741	08-16-02-25-34-24-25-16	V	MRSA_14	H4	PEN, OXA, FOX, TET, CLI	Pig	Nasal swab	Finland	2015	neg	pos	pos	neg	neg	pos	pos	pos	pos	neg	pos	neg	agrI	cap5	pos
CC398	t2741	08-16-02-25-34-24-25-16	V	MRSA_15	H4	PEN, OXA, FOX, TET, CLI	Pig	Nasal swab	Finland	2015	neg	pos	pos	neg	neg	pos	pos	pos	pos	neg	pos	neg	agrI	cap5	pos
CC398	t2741	08-16-02-25-34-24-25-16	V	MRSA_30	H10	PEN, OXA, FOX, TET, CLI	Pig	Nasal swab	Finland	2015	neg	pos	pos	neg	neg	pos	pos	pos	pos	neg	pos	neg	agrI	cap5	pos
CC398	t2741	08-16-02-25-34-24-25-16	V	MRSA_31	H10	PEN, OXA, FOX, TET, CLI	Pig	Nasal swab	Finland	2015	neg	pos	pos	neg	neg	pos	pos	pos	pos	neg	pos	neg	agrI	cap5	pos
CC398	t2741	08-16-02-25-34-24-25-16	V	MRSA_32	H10	PEN, OXA, FOX, TET, CLI	Pig	Nasal swab	Finland	2015	neg	pos	pos	neg	neg	pos	pos	pos	pos	neg	pos	neg	agrI	cap5	pos
CC398	t2741	08-16-02-25-34-24-25-16	V	MRSA_41	H15	PEN, OXA, FOX, TET, CLI	Pig	Nasal swab	Finland	2015	neg	pos	pos	neg	neg	pos	pos	pos	pos	neg	pos	neg	agrI	cap5	pos
CC398	t2741	08-16-02-25-34-24-25-16	V	MRSA_42	H15	PEN, OXA, FOX, TET, CLI	Pig	Nasal swab	Finland	2015	neg	pos	pos	neg	neg	pos	pos	pos	pos	neg	pos	neg	agrI	cap5	pos
CC398	t2741	08-16-02-25-34-24-25-16	V	MRSA_43	H15	PEN, OXA, FOX, TET, CLI	Pig	Nasal swab	Finland	2015	neg	pos	pos	neg	neg	pos	pos	pos	pos	neg	pos	neg	agrI	cap5	pos
CC398	t2741	08-16-02-25-34-24-25-16	V	MRSA_44	H15	PEN, OXA, FOX, TET, CLI	Pig	Nasal swab	Finland	2015	neg	pos	pos	neg	neg	pos	pos	pos	pos	neg	pos	neg	agrI	cap5	pos
CC398	t2741	08-16-02-25-34-24-25-16	V	MRSA_25	H9	PEN, OXA, FOX, TET, CLI, ERY, CIP	Pig	Nasal swab	Finland	2015	neg	pos	pos	pos	neg	pos	pos	pos	pos	neg	pos	neg	agrI	cap5	pos
CC398	t2741	08-16-02-25-34-24-25-16	V	MRSA_47	H17	PEN, OXA, FOX, TET, CLI, ERY	Pig	Carcass swab	Finland	2015	neg	pos	pos	pos	neg	pos	pos	pos	neg	neg	pos	neg	neg	cap5	pos
